# 1   **Hard, soft and just right: variations in linked selection and** 2   **recombination drive genomic divergence during speciation of aspens**

3

4   Jing Wang<sup>1</sup>, Nathaniel R. Street<sup>2</sup>, Douglas G. Scofield<sup>1,3,4</sup>, Pär K. Ingvarsson<sup>1</sup>

5

6   <sup>1</sup> Department of Ecology and Environmental Science, Umeå University, SE-90187,  
7   Umeå, Sweden

8   <sup>2</sup> Umeå Plant Science Centre, Department of Plant Physiology, Umeå University, SE-  
9   90187, Umeå, Sweden

10   <sup>3</sup> Department of Ecology and Genetics: Evolutionary Biology, Uppsala University,  
11   Uppsala, Sweden

12   <sup>4</sup> Uppsala Multidisciplinary Center for Advanced Computational Science, Uppsala  
13   University, Uppsala, Sweden

14

15

16

17

18

19

20

**Corresponding author:**

Dr Pär K. Ingvarsson, Department of Ecology and Environmental Science, Umeå University, Umeå, SE 90187, Sweden. Phone: +46907867414; Fax: +46-(0)-90-786-6705; E-mail: [par.ingvarsson@emg.umu.se](mailto:par.ingvarsson@emg.umu.se)

**Keywords:** *Populus tremula*, *P. tremuloides*, Whole-genome re-sequencing, demographic histories, heterogeneous genomic differentiation, linked selection, recombination

## Abstract

Despite the global economic and ecological importance of forest trees, the genomic basis of differential adaptation and speciation in tree species is still poorly understood. *Populus tremula* and *P. tremuloides* are two of the most widespread tree species in Northern Hemisphere. Using whole-genome re-sequencing data from 24 *P. tremula* and 22 *P. tremuloides* individuals, we find that the two species diverged ~2.2-3.1 million years ago. The approximately allopatric speciation of the two species was likely the results of the severing of the Bering land bridge combined with the onset of dramatic climatic oscillations throughout the Pleistocene. We detected moderate but also considerable heterogeneous genomic differentiation between species. Rather than being physically clustered into just a few large, discrete genomic ‘islands’ as may be expected when species diverges in the presence of gene flow, we found that the regions of differentiation were particularly steep, narrowly defined and located in regions with substantially suppressed recombination. It appears that species-specific adaptation, mainly involving standing genetic variation via soft selective sweeps, was likely the predominant proximate cause in generating the differentiation islands between species and not local differences in permeability of gene flow. In addition, we identified multiple signatures of long-term balancing selection predating speciation in regions containing immunity and defense-related genes in both species.

## Introduction

Understanding how genomes diverge during the process of speciation is a central goal in evolutionary genetics (Nosil, et al. 2009; Strasburg, et al. 2012; Seehausen, et al. 2014). Under neutrality, differentiation is expected to accumulate as a result of the stochastic fixation of polymorphisms by genetic drift (Coyne and Orr 2004). Historical demographic processes can accelerate or decelerate the rate of differentiation through changes in the effective population sizes of nascent daughter species (Avice 2000). In general, both random genetic drift and demographic processes are expected to affect the entire genome (Luikart, et al. 2003). Natural selection, however, is expected to only influence those loci involved in ecological specialization and/or reproductive isolation, resulting in patterns of polymorphisms and divergence that deviate from neutral predictions in genomic regions under selection (Luikart, et al. 2003; Via 2009). The functional architectures of genomes, e.g. mutation and recombination rates, are also important factors in determining genomic landscape of differentiation (Noor and Bennett 2009; Nachman and Payseur 2012; Renaut, et al. 2013; Burri, et al. 2015). For instance, suppressed recombination can lead to increased differentiation by two mechanisms: preventing gene flow between species to avoid the break-up of co-adapted alleles, and the diversity-reducing effects of linked selection (Noor and Bennett 2009). A longstanding challenge in speciation genetics has been to quantify the relative contributions of various evolutionary forces in generating and shaping patterns of genomic divergence during speciation.

With the advance of next generation sequencing (NGS) technologies, a growing number of studies have found highly heterogeneous patterns of genomic

94 differentiation between recently diverged species (Feulner, et al. ; Turner, et al. 2005;  
 95 Ellegren, et al. 2012; Renaut, et al. 2013; Carneiro, et al. 2014; Feulner, et al. 2015).  
 96 A common explanation is that levels of gene flow between species differ across the  
 97 genome, where increased genetic divergence in ‘differentiation islands’ is observed in  
 98 a small number of regions supposed to contain loci involved in reproductive isolation  
 99 (‘speciation islands’), while the remainder of the genome is still permeable to ongoing  
 100 gene flow and therefore shows lower levels of differentiation (Nosil, et al. 2009;  
 101 Sousa and Hey 2013). However, some recent studies have argued that highly  
 102 differentiated regions should represent ‘incidental islands’ that are not tied to the  
 103 speciation processes, but result from the diversity-reduced effects of linked selection  
 104 (either positive or purifying selection) (Noor and Bennett 2009; Turner and Hahn  
 105 2010; Nachman and Payseur 2012; Cruickshank and Hahn 2014). In contrast, long-  
 106 term balancing selection is supposed to maintain stable trans-species polymorphisms  
 107 and leave signatures of unusually low genetic differentiation between species  
 108 (Charlesworth 2006). Under this scenario, heterogeneous selection alone is sufficient  
 109 to generate patterns of heterogeneous genomic differentiation even in complete  
 110 allopatry (Noor and Bennett 2009; Turner and Hahn 2010; White, et al. 2010).  
 111 Exhaustive examination of the above two models is needed in more species and  
 112 should preferably include details concerning the speciation processes, such as time of  
 113 divergence, prevalence and rates of gene flow, well-characterized demographic  
 114 histories and selective and recombination details (Nosil and Feder 2012).

115         Although largely understudied compared to other model species, forest trees  
 116 represent a promising system to understand the genomic basis of species divergence  
 117 and adaptive evolution; as a group they have developed diverse strategies to adapt and  
 118 thrive across a wide range of climates and environments (Neale and Kremer 2011).

*Populus tremula* (European aspen) and *P. tremuloides* (American aspen) are two of the most ecologically important and geographically widespread tree species of the Northern Hemisphere (Figure 1a). Both are keystone species, display rapid growth, high tolerance to environmental stresses, and long-distance pollen and seed dispersal via wind (Eckenwalder 1996; Müller, et al. 2012). Based on their morphological similarity and close phylogenetic relationships, they are considered sister species, or less commonly, conspecific subspecies (Eckenwalder 1996; Wang, et al. 2013). They can readily cross and artificial hybrids usually show high heterosis (Hamzeh and Dayanandan 2004; Tullus, et al. 2012; Wang, et al. 2013). A recent study based on several nuclear and chloroplast loci suggests that the first opening of the Bering land bridge may have driven the allopatric speciation of the two species (Du, et al. 2015).

In accordance with their continent-wide distributions and broad ecological ranges, *P. tremula* and *P. tremuloides* harbor among the highest levels of genetic diversity found in plant species thus far (Wang, et al. unpublished data). The extraordinary levels of genetic diversity in both species and the availability of a high-quality reference genome in the congener, *P. trichocarpa* (Tuskan, et al. 2006), also provide ideal opportunities to identify the relative roles that new mutations (hard selective sweeps) versus pre-existing standing variations (soft selective sweeps) have played during adaptive differentiation and speciation at the genome scale. In hard-sweep models of adaptation, novel beneficial mutations arise and are rapidly fixed in a species, and this process is expected to leave a signature of severely reduced polymorphism in the vicinity of the beneficial mutation (Smith and Haigh 1974). Models of adaptation via soft sweeps assume that beneficial alleles originate from standing genetic variation or by recurrent independent novel mutations (Hermisson and Pennings 2005). Given that the background variation of selectively advantageous

alleles is more heterogeneous in a soft sweep scenario, less severe reductions in levels of polymorphism are expected for soft sweeps compared to hard sweeps (Hermisson and Pennings 2005; Pennings and Hermisson 2006). Based on whole-genome re-sequencing data in both *P. tremula* and *P. tremuloides*, our goals were to: (1) estimate the species' divergence time and reconstruct demographic histories of the two species; (2) infer and distinguish the relative roles of different evolutionary forces in generating and shaping patterns of genomic differentiation between species; (3) evaluate the relative importance of new mutations or standing genetic variation during adaptive divergence in these widespread forest trees; and (4) identify genomic regions and genes that may have evolved in response to directional and balancing selection during speciation.

## Results

We generated whole-genome sequence data for 24 *P. tremula* and 22 *P. tremuloides*, and more than 88% of sequenced reads in each sample were aligned to the *P. trichocarpa* reference genome (Table S1). The average coverage of uniquely mapped reads per site was 25.1 and 22.5 in samples of *P. tremula* and *P. tremuloides*, respectively (Table S1).

## Population structure

The genome-wide NGSadmixture analysis clearly sub-divided all sampled individuals into two species-specific groups when the number of clusters was  $K = 2$  (Figure 1b). When  $K = 3$ , there was evidence for further population sub-structuring in *P. tremuloides*, where individuals from populations originating in Alberta and Wisconsin

clustered into two subgroups. With  $K = 4$ , most *P. tremula* individuals were inferred to be a mixture of two genetic components, showing slight clinal genetic variation with latitude. No further structure was found when  $K = 5$ . A principal component analysis (PCA) further supported these results (Figure 1c). Only the first two components were significant (Table S2) based on a Tracy-Widom test, and these explained, respectively, 21.4% and 2.1% of total genetic variance (Figure 1c). Among the total number of polymorphisms between the two species, fixed differences between *P. tremula* and *P. tremuloides* accounted for 1.1%, whereas 16.7% of polymorphisms were shared between species, with the remaining polymorphic sites being private in either of the two species (Figure 1d).

We examined the extent of population subdivision in *P. tremuloides* by measured  $F_{ST}$  and  $d_{xy}$  between the two *P. tremuloides* populations (Alberta and Wisconsin) along individual chromosomes (Table S3). We found low levels of genetic differentiation ( $F_{ST}$ :  $0.0443 \pm 0.0325$ ) between the populations (Table S3). Total sequence differentiation in the inter-population comparison (mean  $d_{xy}$  =  $0.0165 \pm 0.0083$ ) was similar to mean sequence differences in intra-population comparisons ( $\pi_{\text{Alberta}}$ :  $0.0161 \pm 0.0081$ ;  $\pi_{\text{Wisconsin}}$ :  $0.0157 \pm 0.0080$ , Table S3), indicating that individuals of the two populations were genetically not more different from each other than individuals within each population. Further tests based on the allele frequency spectrum (Tajima's D and Fay & Wu's H) also supported these general patterns (Table S3).

## Demographic histories

We used *fastsimcoal2* (Excoffier, et al. 2013) to infer the divergence time between *P. tremula* and *P. tremuloides* and their past demographic histories from the joint site

frequency spectrum. Eighteen divergence models were evaluated (Table S4), and the best fit was provided by a simple isolation-with-migration model, where populations of *P. tremuloides* experienced exponential growth while a stepwise population size change occurred in *P. tremula* after the two species diverged (Figure 2a). The exact parameter estimates of divergence time, migration rates, population sizes and their associated 95% confidence intervals (CI) inferred from 100 parametric bootstraps are given in Table 1. The estimated split time between *P. tremula* and *P. tremuloides* ( $T_{DIV}$ ) was ~2.3 million years ago (Mya) (bootstrap range [BR]: 2.2-3.1 Mya). The contemporary effective population sizes ( $N_e$ ) of *P. tremula* ( $N_{P.tremula}$ ) and *P. tremuloides* ( $N_{P.tremuloides}$ ) were 102,814 (BR: 93,688-105,671) and 309,500 (BR: 247,321-310,105) respectively, with both being larger than the effective population size of their common ancestor ( $N_{ANC} = 56,235$  [48,012-69,492]). Gene flow ( $2N_em$ , where  $N_e$  is the effective population size and  $m$  is the migration rate) from *P. tremuloides* to *P. tremula* was higher (0.202 migrants per generation [0.156-0.375]) than in the opposite direction (0.053 [0.052-0.117]). It was most likely due to the higher  $N_e$  of *P. tremuloides* compared to *P. tremula* (Slatkin 1985), while the overall migration rates in both directions were fairly low given the large  $N_e$  in both species (Morjan and Rieseberg 2004). The low migration rates are not unexpected given the large geographical distance and disjunct distributions between the two species.

The multiple sequential Markovian coalescent (MSMC)-estimated  $N_e$  for both *P. tremula* (60,796) and *P. tremuloides* (49,701) at the beginning of species divergence (around 2.3 Mya) were very similar to the *fastsimcoal2*-based estimates of  $N_e$  for their ancestral population (Figure 2). Both species experienced similar magnitudes of population decline following their initial divergence, and population expansion in *P. tremuloides* began around 50,000-70,000 years ago and has continued

up to the present (Figure 2b). *P. tremula* experienced a substantial population expansion following a longer bottleneck than that experienced by *P. tremuloides* (Figure 2b).

## **Genome-wide patterns of differentiation and molecular signatures of selection in both high- and low-divergence regions**

We found that the majority of the genome showed moderate genetic differentiation, with average  $F_{ST}$  value across the genome being 0.386 (see Figure 3a for the complete distribution). Visual inspection indicates that genetic differentiation was heterogeneous over 10 Kbp non-overlapping windows across the genome (Figure 4). From the genome-wide empirical  $F_{ST}$  distribution, the cutoff for the top 2.5% highly differentiated outlier windows was  $F_{ST} > 0.681$  (Figure 3a). After removing windows where  $d_{xy}$  values were lower than the genome-wide median (see Materials and Methods), 461 out of 730 highly differentiated windows were retained (Figure 3b).

We based our analysis of genetic signatures of adaptation in these highly divergent regions on our partitioning into categories that were likely to be under either hard or soft selective sweeps based on levels of  $\theta_*$  within each species (see Materials and Methods; Figure 3b). A minority of outlier windows (5.87%) was consistent with patterns expected for hard selective sweeps in both species (black dots in Figure 3b), while somewhat more outlier windows showed signatures of having been influenced by hard sweeps only in *P. tremula* (12.61%, red dots in Figure 3b) or *P. tremuloides* (8.26%, blue dots in Figure 3b). Soft selective sweeps appear to have affected the remaining 73.3% of divergent outlier regions in one or both species (grey dots in Figure 3b). Compared to the rest of the genome, the divergent outlier regions were characterized by multiple signatures of selection in both species regardless of the

specific category that they belong to (as defined above;  $P < 0.05$ , Mann-Whitney U test). These further signatures include significantly skewed allele frequency spectrum towards rare alleles (more negative Tajima's  $D$ ), increased high-frequency derived alleles (more negative Fay & Wu's  $H$ ), and stronger signals of linkage disequilibrium (LD) (Table 2 and Figure S4). Divergent regions linked to soft sweeps showed substantially weaker signatures of selection compared to those linked to hard sweeps, with a much subtle excess of low-frequency alleles and weaker levels of LD (Table 2 and Figure S4a,c), but with comparable or even greater excesses of high-frequency derived alleles (Table 2 and Figure S4b). Furthermore, we found that all highly divergent regions showed significantly higher proportion of inter-species fixed differences and lower proportion of inter-species shared polymorphisms compared to the remainder of the genome (Table 2 and Figure S5 a-c). Even after correcting for possible variation in the mutation rate among genomic regions (Feder, et al. 2005), we found that relative node depths (RND) were significantly higher in divergent regions associated with either hard or soft sweeps than the rest of the genome (Table 2 and Figure S5d).

The cutoff for the bottom 2.5% of the empirical  $F_{ST}$  distribution, denoting outlier windows of exceptionally low levels of interspecies divergence, was  $F_{ST} < 0.169$  (Figure 3a). After excluding windows with coverage breadth lower than 3 Kbp and retaining windows with high levels of polymorphisms in both species (see Materials and Methods), we identified 49 outlier windows as candidate targets of long-term balancing selection (green dots in Figure 3c). In contrast to the genomic background, these candidate regions showed an excess of intermediate-frequency alleles (higher Tajima's  $D$  and Fay & Wu's  $H$  values), and slightly lower levels of LD (Table 2 and Figure S4). In addition, we found a negligible proportion of fixed

differences and significantly higher proportion of shared polymorphism in these regions (Table 2 and Figure S5a-c). The higher RND values (Table 2 and Figure S5d), however, were likely due to higher levels of ancestral polymorphisms that were maintained by balancing selection before the two species split (Cruickshank and Hahn 2014).

Overall, candidate windows potentially under directional (both hard and soft sweeps) or balancing selection were distributed across the genome (Figure 6). We examined the physical sizes of these selected regions by combining adjacent windows if they were all under selection. We found that the sizes of the selected regions all appeared to be quite small, with the majority of selection likely occurring on a physical scale smaller than 10 Kbp (Figure S6).

### **Impact of recombination rate on patterns of genetic differentiation**

We examined relationships between population-scaled recombination rates ( $\rho$ ) and levels of inter-species divergence over non-overlapping 10 Kbp windows (Figure S7). We found significant negative correlations between relative divergence  $F_{ST}$ , which depends on genetic diversity within species, and population recombination rates in both *P. tremula* (Spearman's  $\rho=-0.121$ ,  $P$ -value $<2.2e-16$ ) and *P. tremuloides* (Spearman's  $\rho=-0.157$ ,  $P$ -value $<2.2e-16$ ) (Figure S7a). In contrast to  $F_{ST}$ , there were significant positive correlations between absolute divergence  $d_{xy}$  and recombination rates in both *P. tremula* (Spearman's  $\rho=0.199$ ,  $P$ -value $<2.2e-16$ ) and *P. tremuloides* (Spearman's  $\rho=0.140$ ,  $P$ -value $<2.2e-16$ ) (Figure S7b).

Because  $\rho=4N_e c$ , where  $c$  is the per-generation recombination rate and  $N_e$  is the effective population size, reduction of  $N_e$  in regions linked to selection will lower local estimates of  $\rho$  even if local  $c$  is identical. In order to account for such effects, we

compared  $\rho/\theta$  between regions with signals of selection and the rest of the genome, because both  $\rho$  and  $\theta$  are scaled by  $N_e$ . Relative to genomic background, our results showed significantly suppressed recombination in all selected regions (Figure 5).

### Genes under selection

The availability of an annotated *P. trichocarpa* genome enabled functional analyses of candidate genes within regions that were putatively under selection. In total, 31 genes were located in divergent regions with signatures of hard sweeps in both species (Table S5); 88 and 48 genes, respectively, were found in divergent regions with signatures of hard sweeps only in *P. tremula* and *P. tremuloides* (Table S5), and 310 genes were located in highly differentiated regions with signatures of soft sweeps in either one or both species (Table S5). Regions containing signatures of long-term balancing selection contained a total of 80 genes (Table S6). Except for divergent regions linked to soft sweeps where a significantly lower concentration of genes was found ( $P < 0.001$ , Mann-Whitney U test), all other selected regions showed comparable gene densities compared to the rest of genome (Figure S8).

We used the Gene Ontology (GO) assignments of those candidate genes putatively under selection to test whether specific GO terms were significantly over-represented. After accounting for multiple comparisons, we did not detect any over-representation for divergent regions with signatures of hard sweeps only in one species or with signatures of soft sweeps. However, among genes with signatures of hard sweeps in both species, we found 16 significantly enriched GO terms, mainly including terms associated with transcription initiation and transcription factor activity (Table S7). Within regions with signatures of long-term balancing selection, 21 significantly overrepresented GO terms were identified among the 80 candidate

genes (Table S8), with most of them being associated with immune response and signal transduction.

## Discussion

### Species divergence and demographic histories

Our simulation-based analyses indicated that *P. tremula* and *P. tremuloides* diverged around 2.2-3.1 Mya during the Late Pliocene and/or Early Pleistocene. This timing corresponds closely with the first opening of the Bering Strait, which occurred 3.1-5.5 Mya and broke up the overland intercontinental migration route of terrestrial floras between Eurasia and North America (Marincovich and Gladenkov 1999; Gladenkov, et al. 2002). This may have been less of an immediate barrier to wind-dispersed *Populus* than some other tree species, but the severing of the Bering land bridge associated with the onset of dramatic climatic oscillations through the Pleistocene were likely the principal drivers for initial divergence between *P. tremula* and *P. tremuloides* (Comes and Kadereit 1998; Milne and Abbott 2002; Du, et al. 2015). We found evidence of low gene flow between the two species following geographical isolation, most likely due to the repeated opening and closing of the narrow strait resulting from sea level fluctuations during the Quaternary glacial-interglacial cycles (Hu, et al. 2010). Although these features of early divergence rule out a strictly allopatric mode of speciation, given the modern-day large geographic isolation, disjunct distributions and extremely low rates of gene flow, our results support an approximately allopatric model of speciation for these two aspen species (Morjan and Rieseberg 2004).

We found that the estimated effective sizes of current populations in both species were larger than that of their ancestral population. The large contemporary  $N_e$  of both species are in agreement with their wide geographic distributions and high levels of genomic diversity (Wang, et al. unpublished data). The coalescent-based, intra-species demographic analyses using MSMC also confirmed this pattern, suggesting that both species have experienced substantial population expansion following long-term population declines after divergence. Population expansion of *P. tremuloides* occurred over the last 50,000-70,000 years, following the retreat of the penultimate glaciation and continuing up to the present (Kaufman and Manley 2004). *P. tremula*, in contrast, experienced a more extended population contraction. Consistent with many other forest trees in Europe, the initiation of the substantial expansion in *P. tremula* coincided with the end of the Last Glacial Maximum (Hewitt 2000; Hewitt 2004).

A possible caveat to our demographic inferences is the presence of population subdivision in *P. tremuloides*. However, we found little genetic divergence and similar patterns of genomic variation between the two subpopulations of *P. tremuloides* (see Results), suggesting that subdivision may have occurred too recently to influence our inferences of the speciation processes (Chikhi, et al. 2010). Similarly, sampling could likely be more extensive in both species, to capture a greater extent of the species-wide diversity but this is a perennial concern not restricted to our study. Furthermore, inter-specific hybridization in either species is yet another potential bias. However, there are no other species of *Populus* occurring in the regions from where *P. tremula* were sampled. For *P. tremuloides*, naturally occurring hybridization is only known to occur with *P. grandidentata* in central and eastern North America where the two species co-occur (Pregitzer and Barnes 1980). Therefore any possible

hybridization in our study would be limited to samples from the Wisconsin population of *P. tremuloides*, but as noted above we did not detect any major differences in patterns of genetic variation between the two subpopulations suggesting little or no effect of hybridization.

### **Genome-wide patterns of differentiation between two widespread forest tree species**

We detected moderate but also considerable heterogeneous genomic differentiation between *P. tremula* and *P. tremuloides* (Figure 4). Stochastic genetic drift due to geographical isolation has been proposed as the dominant evolutionary force driving the overall patterns of genomic divergence between the two species (Coyne and Orr 2004). Complex demographic histories experienced by the two species also left distinct patterns of genomic variation within and between species. The more dramatic and/or longer period of range expansion in *P. tremuloides* resulted in genome-wide excesses of low frequency alleles (negative Tajima's D) and the occurrence of more private polymorphisms than in *P. tremula*. In contrast, the longer period of population contraction experienced by *P. tremula* accelerated lineage sorting across the genome due to reductions in effective population size (Fay and Wu 2000), which was supported by the more negative values of Fay & Wu's H and the greater proportion of derived fixed alleles in *P. tremula* relative to *P. tremuloides* (Table 2). Therefore, our study suggests that neutral processes, e.g. drift and demographic history, were responsible for the majority of genetic differentiation between the two aspen species at a genome-wide scale (Strasburg, et al. 2012).

392 In addition to the overall pattern generated by these neutral processes, we  
393 expected to find regions displaying exceptional differentiation ('differentiation  
394 islands') that were characterized by multiple independent signatures of positive  
395 selection in both species, including excesses of low-frequency alleles, increased high-  
396 frequency derived alleles, increased LD, lower proportion of shared polymorphism  
397 and/or higher proportion of fixed differences between species compared to the  
398 genomic background. Rather than being physically clustered into just a few large,  
399 discrete genomic 'islands', as expected when species diverge in the presence of gene  
400 flow (Turner, et al. 2005), we found differentiation islands to be particularly steep,  
401 narrowly defined and located in regions with substantially suppressed recombination  
402 throughout the genome. Given the approximately allopatric mode of speciation we  
403 envision for the two species, the differentiation islands most likely represent regions  
404 harboring loci closely tied to species-specific adaptations rather than those resistant to  
405 gene flow (Coyne and Orr 2004; Turner and Hahn 2010; Cruickshank and Hahn  
406 2014). If natural selection is one of the main evolutionary forces shaping patterns of  
407 genetic differentiation between these species, regions of low recombination would be  
408 expected to show increased  $F_{ST}$  values, but not increased  $d_{xy}$  values (Noor and  
409 Bennett 2009; Cruickshank and Hahn 2014). This occurs because natural selection  
410 (through either selective sweeps and/or background selection) removes neutral  
411 variation over longer distances in regions of low recombination (Begun and Aquadro  
412 1992). As a consequence, relative measures of divergence (e.g.  $F_{ST}$ ) that rely on  
413 within-species diversity are expected to be higher in regions with restricted  
414 recombination (Noor and Bennett 2009; Nachman and Payseur 2012). In contrast,  
415 increased absolute divergence (e.g.  $d_{xy}$ ) is only expected if reduced gene flow  
416 occurred in regions of low recombination (Nachman and Payseur 2012). In

accordance with this view, we observed significant negative relationships between population-scaled recombination rates ( $\rho$ ) and  $F_{ST}$ , but not  $d_{xy}$ , in both species (Noor and Bennett 2009; Keinan, et al. 2010).

Taken together, our findings highlight a significant effect of linked selection in generating the heterogeneous differentiation landscape across the genome (Noor and Bennett 2009; Turner and Hahn 2010; Nachman and Payseur 2012; Cruickshank and Hahn 2014).

### **Implications for understanding the genetic basis of adaptive evolution**

Patterns of polymorphism and divergence around adaptive sites would allow us to study the degree to which adaptation occurred from new beneficial mutations (hard selective sweeps) or from standing genetic variation (soft selective sweeps) (Pritchard, et al. 2010). Population genetic theory predicts that soft sweeps are common in organisms with large population sizes, because adaptation would not be limited by the availability of beneficial mutations and should proceed primarily from standing genetic variation (Hermisson and Pennings 2005). Accordingly, in forest tree species with large distribution ranges and broad ecological niches, adaptation would seem to be more likely to occur via soft sweeps (Barton and Malik 2010). We found that the large majority (73%) of highly differentiated regions due to adaptive divergence between the two species showed signatures of soft sweeps, but notably 27% of highly differentiated regions showed signatures of hard sweeps in either one or in both aspen species. It has been suggested that regions flanking hard sweeps or regions affected by older hard sweeps could be misidentified as soft sweeps because they may produce spurious population genetic signatures resembling soft sweeps (Schrider, et al. 2015). Rather than occurring in the “shoulders” of completed hard sweeps, we found that

most regions with signatures of soft sweeps were distributed across the genome without any association to regions linked to hard sweeps (Figure 4). In addition, we found comparable and even more negative values of Fay & Wu's  $H$  in candidate regions linked to soft sweeps compared to those linked to hard sweeps, suggesting that soft selective sweeps are either incomplete or are still ongoing in many of these regions (Fay and Wu 2000). The signals we observed are thus not likely to be a by-product of older hard selective sweeps (Schrider, et al. 2015). Overall, our results suggest that both hard and soft sweeps have been independently involved in divergent adaptation between *P. tremula* and *P. tremuloides* (Pritchard and Di Rienzo 2010).

In comparison to divergent selection, long-term balancing selection maintains stable trans-species polymorphisms and leave signatures of unusually low genetic differentiation between species (Charlesworth 2006). We identified a number of genomic regions that are potentially under long-term balancing selection in both *P. tremula* and *P. tremuloides*. Apart from low inter-species divergence and high intra-species diversity, these regions are characterized by several other signatures of balancing selection, such as excesses of sites at intermediate frequencies, greater proportions of shared polymorphisms between species and lack of fixed inter-species differences. Due to the long-term effects of recombination on old balanced polymorphisms (Leffler, et al. 2013), we found the signatures and footprints left by balancing selection were generally much narrower and restricted compared to regions under divergent selection, producing comparable or even lower levels of LD than we observed for the rest of the genome. However, after accounting for the influence of local  $N_e$  by measuring  $\rho/\theta_s$ , we found significantly reduced recombination rates in these regions relative to genome-wide averages, indicating that suppressed

recombination is likely to be critical to the maintenance of beneficial trans-species polymorphisms over long evolutionary time scales (Kamau and Charlesworth 2005).

# **Candidate genes and functions**

We were interested in exploring the functional commonalities of candidate genes within regions putatively under either directional or long-term balancing selection in *P. tremula* and *P. tremuloides*. For candidate genes located in highly differentiated regions, no functional over-representation was found in genes linked to either soft sweeps or species-specific hard sweeps. This indicates that a wide range of genes and functional categories are likely to be involved in rapid adaptation in these widespread species (Wolf, et al. 2010). We only found significant enrichment of GO for genes where hard selective sweeps may have occurred in both species. These genes are mainly associated with transcription initiation and transcription factor activity, suggesting that beneficial mutations affecting transcriptional regulation are likely to be a common source of adaptive evolutionary change between recently diverged species (Wittkopp and Kalay 2012). Regions carrying signatures of long-term balancing selection were enriched for genes involved in signal transduction, immune and defense response. It highlights the influence of co-evolutionary arms races between hosts and natural enemies on the persistence of functional genetic diversity in immunity and defense-related genes (Tiffin and Moeller 2006; Salvaudon, et al. 2008). Future studies of these candidate genes are needed to better assess the adaptive genetic potential of these two widespread forest tree species, and to predict how they might respond to current and future climate.

## Conclusion

We have provided insights into the recent evolutionary histories and speciation process separating the two closely related forest tree species, *P. tremula* and *P. tremuloides*. Consistent with the approximately allopatric mode of speciation, we detected moderate levels of genomic differentiation between the two species, and genomic regions of pronounced differentiation were found distributed throughout the genome at many small, independent locations, rather than being clustered into a few large genomic “islands”, as is expected under a model of speciation-with-gene flow. Stochastic genetic drift and historical demographic processes have shaped patterns of polymorphism and differentiation at a genome-wide scale in both species. In addition, we found that species-specific adaptation, mainly involving standing genetic variation via soft selective sweeps, was likely the predominant proximate cause generating the differentiation islands between species, rather than local differences in permeability to gene flow. We must note that this adaptation may largely be unrelated to the speciation process. We also identified multiple signatures of long-term balancing selection in regions of exceptionally low differentiation that appear to have predated speciation. Our study thus highlights that future work should integrate more information on the natural histories of speciation, such as divergence time, geographical context, gene flow magnitudes, demographic histories and sources of adaptation when interpreting the meaning of observed genomic patterns of divergence between closely related species.

## Materials and Methods

## Population samples, sequencing, quality control and mapping

The analysis workflow of this study is shown in Figure S1. We extracted genomic DNA from leaf samples of 24 genotypes in *P. tremula* and 22 genotypes in *P. tremuloides* (Figure 1a and Table S1). We then constructed 2×100 bp paired-end sequencing libraries with target insert sizes of 650bp for all genotypes that were sequenced on the Illumina HiSeq 2000 platform at the Science for Life Laboratory in Stockholm, Sweden. All samples were sequenced to a target coverage of 25X. The sequencing data have been deposited in the Short Read Archive (SRA) at NCBI under accession IDs ranging from XXXXXX-XXXXXX. The same dataset was also used in (Wang, et al. unpublished data).

For all raw sequencing reads (Wang, et al. 2015), we used Trimmomatic (Lohse, et al. 2012) to remove adapter sequences and cut off bases from either the start or the end of reads when the base quality was lower than 20. Reads were completely discarded if there were fewer than 36 bases remaining after trimming. We then mapped all reads to the *P. trichocarpa* reference genome (v3.0) (Tuskan, et al. 2006), with default parameters implemented in bwa-0.7.10 using the BWA-MEM algorithm (Li 2013). Local realignment was performed to correct for the misalignment of bases in regions around insertions and/or deletions (indels) using RealignerTargetCreator and IndelRealigner in GATK v3.2.2 (DePristo, et al. 2011). In order to account for the occurrence of PCR duplicates introduced during library construction, we used MarkDuplicates in Picard (<http://picard.sourceforge.net>) to remove reads with identical external coordinates and insert lengths. Only the read with the highest summed base qualities was kept for downstream analyses.

## Data filtering and genotype calling

Prior to variant and genotype calling, we employed several filtering steps to exclude potential errors caused by paralogous or repetitive DNA sequences. First, after investigating the empirical distribution, we removed sites showing extremely low (<100 reads across all samples per species) or high (>1200 reads across all samples per species) read coverage. Second, as a mapping quality score of zero is assigned for reads that could be equally mapped to multiple genomic locations, we removed sites containing more than 20 such reads among all samples in each species. Third, we removed sites that overlapped with known repeat elements as identified by RepeatMasker (Tarailo-Graovac and Chen 2009). After all filtering steps, there were 42.8% of sites across the genome left for downstream analyses. Among them, 54.9% were found within gene boundaries, and the remainder (45.1%) was located in intergenic regions.

Two alternative bioinformatics approaches were then used (Figure S1): (1) For those population genetic statistics that relied on the inferred site-frequency-spectrum (SFS), estimation was performed directly from genotype likelihoods without calling genotypes (Nielsen, et al. 2011), as implemented in ANGSD (Korneliussen, et al. 2014). Only reads with a minimal mapping quality of 30 and bases with a minimal quality score of 20 were considered. For all filtered sites in both species, we defined the alleles that were the same as those found in the *P. trichocarpa* reference genome as the ancestral allelic state. We used the -doSaf implementation to calculate the site allele frequency likelihood based on the SAMTools genotype likelihood model in all sites (Li, et al. 2009), and then used the -realSFS implementation to obtain a maximum likelihood estimate of the unfolded SFS using the Expectation Maximization (EM) algorithm (Kim, et al. 2011). Several population genetic statistics were then calculated based on the global SFS (Figure S1). (2) For those estimations

that required accurate genotype calls, single nucleotide polymorphisms (SNPs) and genotypes were called with HaplotypeCaller in GATK v3.2.2 (Figure S1). A number of filtering steps were performed to reduce false positives from SNP and genotype calling: (1) Removed SNPs overlapping sites that did not pass all previous filtering criteria; (2) Removed SNPs with more than 2 alleles in both species; (3) Removed SNPs at or within 5bp from any indels; (4) Assigned genotypes as missing if their quality scores (GQ) were lower than 10, and then removed SNPs with more than two missing genotypes in each species. (5) Removed SNPs showing significant deviation from Hardy-Weinberg Equilibrium ( $P < 0.001$ ) in each species. In total, we identified 5,894,205 and 6,281,924 SNPs passing these criteria across the 24 *P. tremula* samples and 22 *P. tremuloides* samples, respectively.

## Population structure

Population genetic structure was inferred using the program NGSadmix (Skotte, et al. 2013), which takes the uncertainty of genotype calling into account and works directly with genotype likelihoods. Only sites with lower than 10% missing data were used. We first used the SAMTools model (Li, et al. 2009) in ANGSD to estimate genotype likelihoods and then generated a beagle file for the subset of the genome that was determined as being variable using a likelihood ratio test ( $P$ -value  $< 10^{-6}$ ) (Kim, et al. 2011). We predefined the number of genetic clusters  $K$  from 2-5, and the maximum iteration of the EM algorithm was set to 10,000.

As another method to visualize the genetic relationships among individuals, we performed principal component analysis (PCA) using ngsTools, which accounts for sequencing errors and uncertainty in genotype calls (Fumagalli, et al. 2014). The expected covariance matrix across pairs of individuals from both species was

computed based on the genotype posterior probabilities across all filtered sites. Eigenvectors and eigenvalues from the covariance matrix were generated with the R function `eigen`, and significance levels were determined using the Tracy-Widom test as implemented in EIGENSOFT version 4.2 (Patterson, et al. 2006).

## Demographic history

To infer demographic history associated with speciation of *P. tremula* and *P. tremuloides*, we used a coalescent simulation-based method implemented in *fastsimcoal* 2.5.1 (Excoffier, et al. 2013). We calculated two-dimensional joint site frequency spectrum (2D-SFS) from posterior probabilities of sample allele frequencies by ngsTools (Fumagalli, et al. 2014). 100,000 coalescent simulations were used for the estimation of the expected 2D-SFS and log-likelihood for a set of demographic parameters in each model. Global maximum likelihood estimates for each model were obtained from 50 independent runs, with 10-40 conditional maximization algorithm cycles, as implemented in *fastsimcoal* 2.5.1. Eighteen divergence models were examined (Figure S2). All models began with the split of the ancestral population into two sub-populations and differed in terms of (i) whether post-divergence gene flow was present or not, (ii) levels and patterns of gene flow between the two species, and (iii) how population size changes occurred, either at the time of species divergence or afterwards (Figure S2). Model comparison was based on the maximum value of likelihood over the 50 independent runs using the Akaike information criterion (AIC) and Akaike's weight of evidence (Excoffier, et al. 2013). The model with the maximum Akaike's weight value was chosen as the optimal one. We assumed a mutation rate of  $2.5 \times 10^{-9}$  per site per year in *Populus* (Koch, et al. 2000) and a generation time of 15 years when converting estimates to units of years

and individuals. Parameter confidence intervals of the best model were obtained by 100 parametric bootstraps, with 50 independent runs in each bootstrap.

We then employed a newly developed multiple sequential Markovian coalescent (MSMC) method (Schiffels and Durbin 2014), which is an extension of a pairwise sequential Markovian coalescent (PSMC) method (Li and Durbin 2011), to estimate variation of scaled population sizes ( $N_e$ ) over historical time in both species. Prior to the analysis, all segregating sites within each species were phased and imputed using fastPHASE v1.4.0 (Scheet and Stephens 2006). Because MSMC measures the time to the first coalescence between all pairs of haplotypes, resolution for recent population size changes can be enhanced if more haplotypes are used (Schiffels and Durbin 2014). We applied MSMC to phased whole-genome sequences from one (two haplotypes), two (four haplotypes) and four (eight haplotypes) individuals in each species, respectively. We did not include more haplotypes because of the high computational cost of greater samples. A generation time of 15 years and a rate of  $2.5 \times 10^{-9}$  mutations per nucleotide per year (Koch, et al. 2000) were used to convert the scaled times and population sizes into real times and sizes.

### **Genome-wide patterns of differentiation**

Because linkage disequilibrium (LD) decays within 10 kilobases (Kbp) in both *P. tremula* and *P. tremuloides* (Wang, et al. unpublished data), we divided the genome into 39,406 non-overlapping windows of 10 Kbp in size to investigate patterns of genomic differentiation between species. For a window to be included in the downstream analyses, we required there to be at least 1 Kbp sites left after all above filtering steps. Levels of genetic differentiation between species at each site were estimated using method-of-moments  $F_{ST}$  estimators implemented in ngsFST from the

ngsTools package (Fumagalli, et al. 2014), which calculates indices of the expected genetic variance between and within species from posterior probabilities of sample allele frequencies, without relying on SNP or genotype calling (Fumagalli, et al. 2013). We then averaged  $F_{ST}$  values of all sites within each 10 Kbp non-overlapping window.

We defined outlier windows of exceptionally high interspecies divergence as windows above the top 2.5% of the  $F_{ST}$  empirical distribution. As  $F_{ST}$  is a relative measure of differentiation and is sensitive to intra-species genetic variation (Charlesworth 1998; Cruickshank and Hahn 2014), we calculated another measure of differentiation,  $d_{xy}$ , which is the pairwise nucleotide divergence between species and that is independent of within-species diversity (Nei 1987).  $d_{xy}$  was calculated from sample allele frequency posterior probabilities at each site using ngsStat from ngsTools software package (Fumagalli, et al. 2014), and was then averaged over non-overlapping 10 Kbp windows. Regions with high  $F_{ST}$  but low  $d_{xy}$  are more likely to be caused by low ancestral polymorphism at times pre-dating speciation (Cruickshank and Hahn 2014), therefore we retained only those outlier windows with  $d_{xy}$  values higher than the genome-wide median value.

We identified windows below the bottom 2.5% of the  $F_{ST}$  empirical distribution as outlier windows of exceptionally low levels of interspecies divergence. Through further screening, we found a skewed pattern of low coverage breadth in lowly differentiated windows compared to the genomic background and the highly diverged windows (Figure S3). There is thus the possibility that regions showing low genetic differentiation may contain some artifacts arising from mis-aligned reads due to repetitive sequences or paralogs, despite the stringent quality filters we have

imposed. We thus performed another more stringent filtering on these regions by only retaining windows with at least 3 Kbp sites left from previous quality filtering steps.

### **Molecular signature of selection in high- and low-divergence regions**

To assess directional selection in highly divergent regions, we considered both hard- and soft-sweep models. We calculated levels of genetic polymorphism ( $\theta_s$ ) using an empirical Bayes approach with the maximum likelihood of unfolded SFS as a prior in ANGSD, within each 10 Kbp non-overlapping window (Kim, et al. 2011). Because hard sweeps would leave a signature of more severe reductions in levels of polymorphism compared to soft sweeps (Hermisson and Pennings 2005; Pennings and Hermisson 2006), a 5% threshold of  $\theta_s$  was applied for outlier windows of exceptional differentiation to classify divergent regions into four mutually exclusive categories: (1) hard selective sweeps occurred in both species if  $\theta_s$  dropped below the bottom 5% of empirical distribution in both species; (2) and (3) hard selective sweeps occurred in only one of *P. tremula* or *P. tremuloides* if  $\theta_s$  dropped below the bottom 5% of empirical distribution only in the respective species; (4) adaptations occurred from standing genetic variation (soft selective sweeps) if  $\theta_s$  appeared similar to background levels (not below the threshold). In contrast to directional selection, one of the strongest signatures of long-term balancing selection is an excess of polymorphism surrounding the target of selection (Charlesworth 2006). We considered outlier windows with exceptionally low  $F_{ST}$  values as potentially being subject to long-term balancing selection if  $\theta_s$  were in the top 5% of the empirical distribution in both species.

We compared different unions of outlier windows to the remaining portion of the genome by a variety of additional population genetic statistics in both species.

First, Tajima's  $D$  (Tajima 1989) and Fay & Wu's  $H$  (Fay and Wu 2000) were calculated from sample allele frequency likelihoods in ANGSD. Second, levels of LD and population-scaled recombination rates ( $\rho$ ) were estimated based on the SNP data created by GATK. To evaluate levels of LD within each 10 Kbp window, the correlation coefficients ( $r^2$ ) between SNPs with pairwise distances larger than 1 Kbp were calculated using VCFtools v0.1.12b (Danecek, et al. 2011). Population-scaled recombination rates  $\rho = 4N_e c$  (Where  $N_e$  is the effective population size and  $c$  is the recombination rate) were estimated using the Interval program of LDhat 2.2 (McVean, et al. 2004) with 1,000,000 MCMC iterations sampling every 2,000 iterations and a block penalty parameter of five. The first 100,000 iterations of the MCMC iterations were discarded as burn-in. Resulting estimates of  $r^2$  and  $\rho$  were averaged over each 10 Kbp window. In any of the two species, windows were discarded in the estimation of  $r^2$  and  $\rho$  if there were less than 3 Kbp and/or 10 SNPs left from previous filtering steps. Finally, we used the program ngsStat (Fumagalli, et al. 2014) to calculate another three measures of genetic differentiation in each window: with *P. trichocarpa* as an outgroup, the proportion of fixed differences that is caused by either fixed derived alleles in *P. tremula* or *P. tremuloides* among all segregating sites; the proportion of inter-species shared polymorphisms among all segregating sites; and the relative node depth (RND). RND was calculated by dividing the  $d_{xy}$  of the two aspen species by  $d_{xy}$  between aspen (represented by 24 samples of *P. tremula* in this study) and *P. trichocarpa* (24 samples; see (Wang, et al. unpublished data). Significance of the differences between regions putatively under selection and the genome-wide averages for all above mentioned population genetic statistics were examined using one-sided Wilcoxon ranked-sum tests.

## Gene ontology (GO) enrichment

To determine whether any functional classes of genes were overrepresented among regions putatively under selection, we performed functional enrichment analysis of gene ontology (GO) using Fisher's exact test by agriGO's Term Enrichment tool (<http://bioinfo.cau.edu.cn/agriGO/index.php>; (Du, et al. 2010). GO groups with fewer than two outlier genes were excluded from this analysis. *P*-values of Fisher's exact test were further corrected for multiple testing with Benjamini-Hochberg false discovery rate (Benjamini and Hochberg 1995). GO terms with a corrected *P*-value <0.05 were considered to be significantly enriched.

## Acknowledgements

We are grateful to Rick Lindroth for providing access to the samples of *P. tremuloides* used in this study. We thank Carin Olofsson for extracting DNA for all samples used in this study. The research has been funded through grants from Vetenskapsrådet and a Young Researcher Award from Umeå University to PKI. JW was supported by a scholarship from the Chinese Scholarship Council (No. 2011618053).

## References

- Avice JC. 2000. Phylogeography: the history and formation of species: Harvard university press.
- Barton N, Malik HS. 2010. Understanding Adaptation in Large Populations. PLoS Genet 6:e1000987.

740 Begun DJ, Aquadro CF. 1992. Levels of naturally occurring DNA polymorphism  
741 correlate with recombination rates in *D. melanogaster*. *Nature* 356:519-520.

742 Benjamini Y, Hochberg Y. 1995. Controlling the false discovery rate: a practical  
743 and powerful approach to multiple testing. *Journal of the Royal Statistical*  
744 *Society. Series B (Methodological)*:289-300.

745 Burri R, Nater A, Kawakami T, Mugel CF, Olason PI, Smeds L, Suh A, Dutoit L,  
746 Bureš S, Garamszegi LZ. 2015. Linked selection and recombination rate variation  
747 drive the evolution of the genomic landscape of differentiation across the  
748 speciation continuum of *Ficedula* flycatchers. *Genome research*:gr.  
749 196485.196115.

750 Carneiro M, Albert F, Afonso S, Pereira R, Burbano H, Campos R, Melo-Ferreira J,  
751 Blanco-Aguilar J, Villafuerte R, Nachman M. 2014. The Genomic Architecture of  
752 Population Divergence between Subspecies of the European Rabbit. *PLoS*  
753 *genetics* 10:e1003519.

754 Charlesworth B. 1998. Measures of divergence between populations and the  
755 effect of forces that reduce variability. *Molecular biology and evolution* 15:538-  
756 543.

757 Charlesworth D. 2006. Balancing selection and its effects on sequences in nearby  
758 genome regions. *PLoS Genet* 2:e64.

759 Chikhi L, Sousa VC, Luisi P, Goossens B, Beaumont MA. 2010. The confounding  
760 effects of population structure, genetic diversity and the sampling scheme on the  
761 detection and quantification of population size changes. *Genetics* 186:983-995.

762 Comes HP, Kadereit JW. 1998. The effect of Quaternary climatic changes on plant  
763 distribution and evolution. *Trends in plant science* 3:432-438.

764 Coyne JA, Orr HA. 2004. *Speciation*: Sinauer Associates Sunderland, MA.

765 Cruickshank TE, Hahn MW. 2014. Reanalysis suggests that genomic islands of  
766 speciation are due to reduced diversity, not reduced gene flow. *Molecular*  
767 *ecology* 23:3133-3157.

768 Danecek P, Auton A, Abecasis G, Albers CA, Banks E, DePristo MA, Handsaker RE,  
769 Lunter G, Marth GT, Sherry ST. 2011. The variant call format and VCFtools.  
770 *Bioinformatics* 27:2156-2158.

771 DePristo MA, Banks E, Poplin R, Garimella KV, Maguire JR, Hartl C, Philippakis  
772 AA, Del Angel G, Rivas MA, Hanna M. 2011. A framework for variation discovery  
773 and genotyping using next-generation DNA sequencing data. *Nature genetics*  
774 43:491-498.

775 Du S, Wang Z, Ingvarsson PK, Wang D, Wang J, Wu Z, Tembrock LR, Zhang J.  
776 2015. Multilocus Analysis of Nucleotide Variation and Speciation in Three  
777 Closely Related *Populus* (Salicaceae) Species. *Molecular ecology*.

778 Du Z, Zhou X, Ling Y, Zhang Z, Su Z. 2010. agriGO: a GO analysis toolkit for the  
779 agricultural community. *Nucleic acids research* 38:W64-W70.

780 Eckenwalder JE. 1996. Systematics and evolution of *Populus*. *Biology of Populus*  
781 *and its Implications for Management and Conservation*:7-32.

782 Ellegren H, Smeds L, Burri R, Olason PI, Backström N, Kawakami T, Künstner A,  
783 Mäkinen H, Nadachowska-Brzyska K, Qvarnström A. 2012. The genomic  
784 landscape of species divergence in *Ficedula* flycatchers. *Nature* 491:756-760.

785 Excoffier L, Dupanloup I, Huerta-Sánchez E, Sousa V, Foll M. 2013. Robust  
786 demographic inference from genomic and SNP data. *PLoS genetics* 9:e1003905.

787 Fay JC, Wu C-I. 2000. Hitchhiking under positive Darwinian selection. *Genetics*  
788 155:1405-1413.

789 Feder JL, Xie X, Rull J, Velez S, Forbes A, Leung B, Dambroski H, Filchak KE, Aluja  
790 M. 2005. Mayr, Dobzhansky, and Bush and the complexities of sympatric  
791 speciation in *Rhagoletis*. *Proceedings of the National Academy of Sciences*  
792 102:6573-6580.

793 Feulner P, Chain F, Panchal M, Huang Y, Eizaguirre C, Kalbe M, Lenz T, Samonte I,  
794 Stoll M, Bornberg-Bauer E. 2015. Genomics of Divergence along a Continuum of  
795 Parapatric Population Differentiation. *PLoS genetics* 11:e1004966.

796 Feulner PG, Chain FJ, Panchal M, Huang Y, Eizaguirre C, Kalbe M, Lenz TL,  
797 Samonte IE, Stoll M, Bornberg-Bauer E. Genomics of divergence along a  
798 continuum of parapatric population differentiation.

799 Fumagalli M, Vieira FG, Korneliussen TS, Linderöth T, Huerta-Sánchez E,  
800 Albrechtsen A, Nielsen R. 2013. Quantifying population genetic differentiation  
801 from next-generation sequencing data. *Genetics* 195:979-992.

802 Fumagalli M, Vieira FG, Linderöth T, Nielsen R. 2014. ngsTools: methods for  
803 population genetics analyses from next-generation sequencing data.  
804 *Bioinformatics* 30:1486-1487.

805 Gladenkov AY, Oleinik AE, Marincovich L, Barinov KB. 2002. A refined age for the  
806 earliest opening of Bering Strait. *Palaeogeography, Palaeoclimatology,*  
807 *Palaeoecology* 183:321-328.

808 Hamzeh M, Dayanandan S. 2004. Phylogeny of *Populus* (Salicaceae) based on  
809 nucleotide sequences of chloroplast trnT-trnF region and nuclear rDNA.  
810 *American journal of botany* 91:1398-1408.

811 Hermisson J, Pennings PS. 2005. Soft sweeps molecular population genetics of  
812 adaptation from standing genetic variation. *Genetics* 169:2335-2352.

813 Hewitt G. 2004. Genetic consequences of climatic oscillations in the Quaternary.  
814 Philosophical Transactions of the Royal Society of London B: Biological Sciences  
815 359:183-195.

816 Hewitt G. 2000. The genetic legacy of the Quaternary ice ages. Nature 405:907-  
817 913.

818 Hu A, Meehl GA, Otto-Bliesner BL, Waelbroeck C, Han W, Loutre M-F, Lambeck K,  
819 Mitrovica JX, Rosenbloom N. 2010. Influence of Bering Strait flow and North  
820 Atlantic circulation on glacial sea-level changes. Nature Geoscience 3:118-121.

821 Kamau E, Charlesworth D. 2005. Balancing selection and low recombination  
822 affect diversity near the self-incompatibility loci of the plant *Arabidopsis lyrata*.  
823 Current Biology 15:1773-1778.

824 Kaufman D, Manley W. 2004. Quaternary glaciations—Extent and chronology,  
825 Part II: North America: Developments in Quaternary Science Volume 2.

826 Keinan A, Reich D, Begun DJ. 2010. Human population differentiation is strongly  
827 correlated with local recombination rate. PLoS Genet 6:e1000886.

828 Kim SY, Lohmueller KE, Albrechtsen A, Li Y, Korneliussen T, Tian G, Grarup N,  
829 Jiang T, Andersen G, Witte D. 2011. Estimation of allele frequency and  
830 association mapping using next-generation sequencing data. BMC bioinformatics  
831 12:231.

832 Koch MA, Haubold B, Mitchell-Olds T. 2000. Comparative evolutionary analysis of  
833 chalcone synthase and alcohol dehydrogenase loci in *Arabidopsis*, *Arabis*, and  
834 related genera (Brassicaceae). Molecular biology and evolution 17:1483-1498.

835 Korneliussen TS, Albrechtsen A, Nielsen R. 2014. ANGSD: analysis of next  
836 generation sequencing data. BMC bioinformatics 15:356.

837 Leffler EM, Gao Z, Pfeifer S, Ségurel L, Auton A, Venn O, Bowden R, Bontrop R,  
838 Wall JD, Sella G. 2013. Multiple instances of ancient balancing selection shared  
839 between humans and chimpanzees. *Science* 339:1578-1582.

840 Li H. 2013. Aligning sequence reads, clone sequences and assembly contigs with  
841 BWA-MEM. arXiv preprint arXiv:1303.3997.

842 Li H, Durbin R. 2011. Inference of human population history from individual  
843 whole-genome sequences. *Nature* 475:493-496.

844 Li H, Handsaker B, Wysoker A, Fennell T, Ruan J, Homer N, Marth G, Abecasis G,  
845 Durbin R. 2009. The sequence alignment/map format and SAMtools.  
846 *Bioinformatics* 25:2078-2079.

847 Lohse M, Bolger A, Nagel A, Fernie AR, Lunn JE, Stitt M, Usadel B. 2012. RobiNA: a  
848 user-friendly, integrated software solution for RNA-Seq-based transcriptomics.  
849 *Nucleic acids research*:gks540.

850 Luikart G, England PR, Tallmon D, Jordan S, Taberlet P. 2003. The power and  
851 promise of population genomics: from genotyping to genome typing. *Nature*  
852 *Reviews Genetics* 4:981-994.

853 Marincovich L, Gladenkov AY. 1999. Evidence for an early opening of the Bering  
854 Strait. *Nature* 397:149-151.

855 McVean GA, Myers SR, Hunt S, Deloukas P, Bentley DR, Donnelly P. 2004. The  
856 fine-scale structure of recombination rate variation in the human genome.  
857 *Science* 304:581-584.

858 Milne RI, Abbott RJ. 2002. The origin and evolution of Tertiary relict floras.  
859 *Advances in Botanical Research* 38:281-314.

860 Morjan CL, Rieseberg LH. 2004. How species evolve collectively: implications of  
861 gene flow and selection for the spread of advantageous alleles. *Molecular ecology*  
862 13:1341-1356.

863 Müller A, Leuschner C, Horna V, Zhang C. 2012. Photosynthetic characteristics  
864 and growth performance of closely related aspen taxa: on the systematic  
865 relatedness of the Eurasian *Populus tremula* and the North American *P.*  
866 *tremuloides*. *Flora-Morphology, Distribution, Functional Ecology of Plants*  
867 207:87-95.

868 Nachman MW, Payseur BA. 2012. Recombination rate variation and speciation:  
869 theoretical predictions and empirical results from rabbits and mice.  
870 *Philosophical Transactions of the Royal Society B: Biological Sciences* 367:409-  
871 421.

872 Neale DB, Kremer A. 2011. Forest tree genomics: growing resources and  
873 applications. *Nature Reviews Genetics* 12:111-122.

874 Nei M. 1987. *Molecular evolutionary genetics*: Columbia university press.

875 Nielsen R, Korneliussen T, Albrechtsen A, Li Y, Wang J. 2011. SNP calling,  
876 genotype calling, and sample allele frequency estimation from New-Generation  
877 Sequencing data. *PloS one* 7:e37558.

878 Noor MA, Bennett SM. 2009. Islands of speciation or mirages in the  
879 desert? Examining the role of restricted recombination in maintaining  
880 species. *Heredity* 103:439-444.

881 Nosil P, Feder JL. 2012. Genomic divergence during speciation: causes and  
882 consequences. *Philosophical Transactions of the Royal Society B: Biological*  
883 *Sciences* 367:332-342.

884 Nosil P, Funk DJ, ORTIZ - BARRIENTOS D. 2009. Divergent selection and  
885 heterogeneous genomic divergence. *Molecular ecology* 18:375-402.

886 Patterson N, Price A, Reich D. 2006. Population structure and eigenanalysis. *PLoS*  
887 *Genet* 2:e190.

888 Pennings PS, Hermisson J. 2006. Soft sweeps III: the signature of positive  
889 selection from recurrent mutation. *PLoS Genet* 2:e186.

890 Pregitzer KS, Barnes BV. 1980. Flowering phenology of *Populus tremuloides* and  
891 *P. grandidentata* and the potential for hybridization. *Canadian Journal of Forest*  
892 *Research* 10:218-223.

893 Pritchard JK, Di Rienzo A. 2010. Adaptation—not by sweeps alone. *Nature*  
894 *Reviews Genetics* 11:665-667.

895 Pritchard JK, Pickrell JK, Coop G. 2010. The genetics of human adaptation: hard  
896 sweeps, soft sweeps, and polygenic adaptation. *Current Biology* 20:R208-R215.

897 Renaut S, Grassa C, Yeaman S, Moyers B, Lai Z, Kane N, Bowers J, Burke J,  
898 Rieseberg L. 2013. Genomic islands of divergence are not affected by geography  
899 of speciation in sunflowers. *Nature Communications* 4:1827.

900 Salvaudon L, Giraud T, Shykoff JA. 2008. Genetic diversity in natural populations:  
901 a fundamental component of plant–microbe interactions. *Current opinion in*  
902 *plant biology* 11:135-143.

903 Scheet P, Stephens M. 2006. A fast and flexible statistical model for large-scale  
904 population genotype data: applications to inferring missing genotypes and  
905 haplotypic phase. *The American Journal of Human Genetics* 78:629-644.

906 Schiffels S, Durbin R. 2014. Inferring human population size and separation  
907 history from multiple genome sequences. *Nature genetics* 46:919-925.

908 Schrider DR, Mendes FK, Hahn MW, Kern AD. 2015. Soft shoulders ahead:  
909 spurious signatures of soft and partial selective sweeps result from linked hard  
910 sweeps. *Genetics* 200:267-284.

911 Seehausen O, Butlin RK, Keller I, Wagner CE, Boughman JW, Hohenlohe PA,  
912 Peichel CL, Saetre G-P, Bank C, Brännström Å. 2014. Genomics and the origin of  
913 species. *Nature Reviews Genetics* 15:176-192.

914 Skotte L, Korneliussen TS, Albrechtsen A. 2013. Estimating individual admixture  
915 proportions from next generation sequencing data. *Genetics* 195:693-702.

916 Slatkin M. 1985. Gene flow in natural populations. *Annual review of ecology and*  
917 *systematics*:393-430.

918 Smith JM, Haigh J. 1974. The hitch-hiking effect of a favourable gene. *Genetical*  
919 *research* 23:23-35.

920 Sousa V, Hey J. 2013. Understanding the origin of species with genome-scale  
921 data: modelling gene flow. *Nature Reviews Genetics* 14:404-414.

922 Strasburg JL, Sherman NA, Wright KM, Moyle LC, Willis JH, Rieseberg LH. 2012.  
923 What can patterns of differentiation across plant genomes tell us about  
924 adaptation and speciation? *Philosophical Transactions of the Royal Society B:*  
925 *Biological Sciences* 367:364-373.

926 Tajima F. 1989. Statistical method for testing the neutral mutation hypothesis by  
927 DNA polymorphism. *Genetics* 123:585-595.

928 Tarailo-Graovac M, Chen N. 2009. Using RepeatMasker to Identify Repetitive  
929 Elements in Genomic Sequences. *Current Protocols in Bioinformatics* 4:1-4.10.

930 Tiffin P, Moeller DA. 2006. Molecular evolution of plant immune system genes.  
931 *Trends in genetics* 22:662-670.

932 Tullus A, Rytter L, Tullus T, Weih M, Tullus H. 2012. Short-rotation forestry with  
 933 hybrid aspen (*Populus tremula* L. × *P. tremuloides* Michx.) in Northern Europe.  
 934 Scandinavian Journal of Forest Research 27:10-29.

935 Turner T, Hahn M, Nuzhdin S. 2005. Genomic islands of speciation in *Anopheles*  
 936 *gambiae*. PLoS Biol 3:e285.

937 Turner TL, Hahn MW. 2010. Genomic islands of speciation or genomic islands  
 938 and speciation? Molecular ecology 19:848-850.

939 Tuskan G, Difazio S, Jansson S, Bohlmann J, Grigoriev I, Hellsten U, Putnam N,  
 940 Ralph S, Rombauts S, Salamov A. 2006. The genome of black cottonwood,  
 941 *Populus trichocarpa* (Torr. & Gray). Science 313:1596-1604.

942 Via S. 2009. Natural selection in action during speciation. Proceedings of the  
 943 National Academy of Sciences 106:9939-9946.

944 Wang J, Scofield D, Street N, Ingvarsson P. 2015. Variant calling using NGS data in  
 945 European aspen (*Populus tremula*).

946 Wang J, Street NR, Scofield DG, Ingvarsson PK. unpublished data. Comparative  
 947 population genomics of three related *Populus* species. bioRxiv:026344.

948 Wang Z, Du S, Dayanandan S, Wang D, Zeng Y, Zhang J. 2013. Phylogeny  
 949 reconstruction and hybrid analysis of populus (salicaceae) based on nucleotide  
 950 sequences of multiple single-copy nuclear genes and plastid fragments. PloS one  
 951 9:e103645.

952 White BJ, Cheng C, Simard F, Costantini C, Besansky NJ. 2010. Genetic association  
 953 of physically unlinked islands of genomic divergence in incipient species of  
 954 *Anopheles gambiae*. Molecular ecology 19:925-939.

955 Wittkopp PJ, Kalay G. 2012. Cis-regulatory elements: molecular mechanisms and  
 956 evolutionary processes underlying divergence. *Nature Reviews Genetics* 13:59-  
 957 69.

958 Wolf JB, Lindell J, Backström N. 2010. Speciation genetics: current status and  
 959 evolving approaches. *Philosophical Transactions of the Royal Society of London*  
 960 *B: Biological Sciences* 365:1717-1733.

961

962

963

964

965

966

967

968

969

970

971

972

973

974

975

976

977

978

## Figures and Tables

**Figure 1. Geographic distribution and genetic structure of 24 *Populus tremula* and 22 *P. tremuloides*.** (a) Map showing the current geographic distribution of *P. tremula* (red) and *P. tremuloides* (blue). Yellow circles and triangles indicate the locations where the 24 individuals of *P. tremula* and 22 individuals of *P. tremuloides* were sampled. (b) Genetic structure of the two aspen species inferred using NGSadmix. The y-axis quantifies subgroup membership, and the x-axis shows the sample ID for each individual. (c) Principal component analysis (PCA) plot based on genetic covariance among all individuals of *P. tremula* (red circle) and *P. tremuloides* (green square and blue triangle). The first two principle components (PCs) are shown, with PC1 explaining 21.04% ( $P=2.51 \times 10^{-19}$ , Tacey-Widom test) of the overall genetic variation and separating the two species and PC2 explaining 2.09% ( $P=9.65 \times 10^{-4}$ , Tracy-Widom test) of the overall variation and separating the Wisconsin samples (blue triangle) of *P. tremuloides* from Alberta (green square). (d) Pie chart summarizing the proportion of fixed, shared and exclusive polymorphisms of the two aspen species.

**Figure 2. Demographic history of *Populus tremula* and *P. tremuloides*.** (a) Graphical summary of the most likely inferred demographic scenario of speciation implemented in *fastsimcoal2*. (b) Multiple sequential Markovian coalescent (MSMC) estimates of the effective population size ( $N_e$ ) changes for *P. tremula* (red line) and *P. tremuloides* (blue line) based on the inference from two (dashed), four (dotted) and eight (solid) phased haplotypes. Time scale on the x-axis is calculated assuming a

neutral mutation rate per generation ( $\mu$ ) =  $3.75 \times 10^{-8}$  and generation time ( $g$ ) = 15 years. The grey bar indicates the speciation time inferred by *fastsimcoal2*.

**Figure 3. Illustration of the strategy for detecting candidate regions under**

**selection.** (a) Frequency histogram of the distribution of  $F_{ST}$  values over 10 Kbp non-

overlapping windows across the genome. Data points located to the left ( $F_{ST}=0.169$ )

and right ( $F_{ST}=0.681$ ) vertical dashed lines (corresponding to the bottom and top 2.5%

of the empirical  $F_{ST}$  distribution) were identified as regions with exceptional low and

high differentiation between *P. tremula* and *P. tremuloides*. (b) For windows with

exceptional high differentiation between species, two steps of filtering were

performed. In step1, we filtered windows where  $d_{xy}$  was smaller than the genome-

wide median value. In step 2, the bottom 5% thresholds (short dashed lines) of

nucleotide diversity ( $\theta_\pi$ ) was applied to classify divergent windows into four mutually

exclusive categories: hard selective sweeps occurred in both species (black dots) if  $\theta_\pi$

dropped below the bottom 5% of empirical distribution in both species; hard sweeps

occurred in only one of *P. tremula* (red dots) and *P. tremuloides* (blue dots) if  $\theta_\pi$

dropped below the bottom 5% of empirical distribution only in the respective species;

adaptation occurred from standing genetic variation (soft selective sweeps, grey dots)

if  $\theta_\pi$  appeared similar as background (not below the threshold). In both (b) and (c) the

long dashed lines indicate the genome-wide median values of  $\theta_\pi$  in *P. tremula* and *P.*

*tremuloides*, respectively. (c) For windows with exceptional low differentiation

between species, we performed two filtering steps to identify regions potentially

under long-term balancing selection. In step1, we filtered windows where the

coverage breadth was lower than 3 Kbp. In step2, only windows where  $\theta_\pi$  was above

the top 5% of empirical distributions (short dashed lines) in both species were

considered as being under long-term balancing selection (green dots). Please refer to Table 2 for the proportion and other genomic features for each category.

**Figure 4. Genome-wide divergence.** Chromosomal distribution of genetic differentiation ( $F_{ST}$ ) between *Populus tremula* and *P. tremuloides*. The small, light blue dots indicate  $F_{ST}$  values estimated over 10 Kbp non-overlapping windows. Grey lines indicate  $F_{ST}$  values estimated over 100 Kbp non-overlapping windows. Locations for windows showing specific signatures of selection are highlighted with colored bars above the plot. Among them, candidate windows under hard selective sweeps in either one or both species (red, blue and black bars) are located on the topside; candidate windows with signatures of soft sweeps in either one or both species (grey bars) are located in the middle; and candidate windows under long-term balancing selection (green bars) in both species are located at the bottom of all bars.

**Figure 5. Comparisons of recombination rates ( $\rho/\theta_x$ ) between selected regions and genomic background in *P. tremula* (a) and *P. tremuloides* (b).** Black, red, blue, grey, green and light blue boxplots represent  $\rho/\theta_x$  within regions with signatures of hard sweeps in both species, only in *P. tremula*, only in *P. tremuloides*, soft sweeps in either one or both species, long-term balancing selection and the rest of the genome, respectively. Asterisks designate significant differences between candidate regions with signatures of selection and the rest of genomic regions by Mann-Whitney U test (\*  $P$ -value < 0.05; \*\*  $P$ -value < 1e-4; \*\*\* $P$ -value < 2.2e-16).

**Table 1.** Inferred demographic parameters of the divergence history between *P. tremula* and *P. tremuloides* for the best model shown in Figure 2a.

1053

| Parameters                                  | Point estimation | 95% CI <sup>a</sup> |             |
|---------------------------------------------|------------------|---------------------|-------------|
|                                             |                  | Lower bound         | Upper bound |
| $N_{ANC}$                                   | 56235            | 48012               | 69492       |
| $N_{P.tremula}$                             | 102814           | 93688               | 105671      |
| $N_{P.tremuloides}$                         | 309500           | 247321              | 310105      |
| $2Nm_{P.tremuloides \rightarrow P.tremula}$ | 0.202            | 0.156               | 0.375       |
| $2Nm_{P.tremula \rightarrow P.tremuloides}$ | 0.053            | 0.052               | 0.117       |
| $T_{DIV}$                                   | 2332410          | 2186760             | 3113520     |

1054

1055 Parameters are defined in Figure 2a. N indicates the effective population size of *P. tremula*, *P.*  
1056 *tremuloides* or their ancestral population, m indicates the migration rates between species on either  
1057 direction,  $T_{DIV}$  indicates the estimated divergence time between the two species from *fastsimcoal 2*.

1058 <sup>a</sup>Parametric bootstrap estimates obtained by parameter estimation from 100 data sets simulated  
1059 according to the overall maximum composite likelihood estimates shown in point estimation columns.

1060 Estimation were obtained from 100,000 simulations per likelihood.

1061

1062

1063

1064

1065

1066

1067

1068 **Table 2. Summary statistics characterizing selected regions in both *P. tremula* and**  
1069 ***P. tremuloides*.**

1070

| Parameters  | Species               | Both <sup>a</sup><br>(5.87%) | <i>P. tremula</i> <sup>a</sup><br>(12.61%) | <i>P. tremuloides</i> <sup>a</sup><br>(8.26%) | Soft <sup>a</sup><br>(73.26%) | Balancing <sup>a</sup> | Background <sup>a</sup> |
|-------------|-----------------------|------------------------------|--------------------------------------------|-----------------------------------------------|-------------------------------|------------------------|-------------------------|
| $\theta\pi$ | <i>P. tremula</i>     | 0.0039***                    | 0.0046***                                  | 0.0092**                                      | 0.0112***                     | 0.0404***              | 0.0147                  |
|             | <i>P. tremuloides</i> | 0.0054***                    | 0.0103**                                   | 0.0059***                                     | 0.0133**                      | 0.0422***              | 0.0159                  |
| Tajima's D  | <i>P. tremula</i>     | -1.2763***                   | -1.2731***                                 | -0.6377**                                     | -0.7137***                    | 0.2433**               | -0.3016                 |
|             | <i>P. tremuloides</i> | -1.9246***                   | -1.4904**                                  | -1.8498***                                    | -1.4244***                    | -0.2711***             | -1.1606                 |
| Fay&Wu'sH   | <i>P. tremula</i>     | -0.6659**                    | -0.8390***                                 | -0.6167**                                     | -0.7786***                    | -0.0986**              | -0.4008                 |
|             | <i>P. tremuloides</i> | -0.3908*                     | -0.4265**                                  | -0.5809**                                     | -0.6168***                    | -0.0954**              | -0.3236                 |
| $r^2$       | <i>P. tremula</i>     | 0.2796*                      | 0.2700**                                   | 0.2786**                                      | 0.2571**                      | 0.1718*                | 0.2115                  |
|             | <i>P. tremuloides</i> | 0.2894**                     | 0.2336**                                   | 0.2250**                                      | 0.2202**                      | 0.1393                 | 0.1575                  |
| Fixed (%)   | <i>P. tremula</i>     | 0.0997***                    | 0.0609***                                  | 0.0625***                                     | 0.0470***                     | ~0**                   | 0.0055                  |
|             | <i>P. tremuloides</i> | 0.0767***                    | 0.0349***                                  | 0.0644***                                     | 0.0372***                     | ~0**                   | 0.0035                  |
| Shared (%)  |                       | 0.0487***                    | 0.0688***                                  | 0.0727***                                     | 0.1001***                     | 0.3718***              | 0.1662                  |
| $F_{ST}$    |                       | 0.8280***                    | 0.7447***                                  | 0.7544***                                     | 0.7258***                     | 0.1330***              | 0.3836                  |
| $d_{xy}$    |                       | 0.0270*                      | 0.0297**                                   | 0.0309**                                      | 0.0448***                     | 0.0468***              | 0.0248                  |
| RND         |                       | 0.8404**                     | 0.7527***                                  | 0.7789**                                      | 0.8105***                     | 0.7614***              | 0.5509                  |

1071 <sup>a</sup>Both indicates candidate regions with signatures of hard selective sweeps in both species; *P. tremula*  
1072 and *P. tremuloides* indicate candidate regions with signatures of hard sweeps only in the respective  
1073 species; Soft indicates candidate regions with signatures of soft sweeps in either one or both species;  
1074 Balancing indicates candidate regions with signatures of long-standing balancing selection in both  
1075 species. Background indicates the rest of the genome not showing exceptional differentiation. Asterisks  
1076 designate significant differences between the regions under selection and the rest of genomic regions  
1077 by Mann-Whitney U test (\*  $P$ -value < 0.05; \*\*  $P$ -value < 1e-4; \*\*\* $P$ -value < 2.2e-16).

1078

1079

(a)

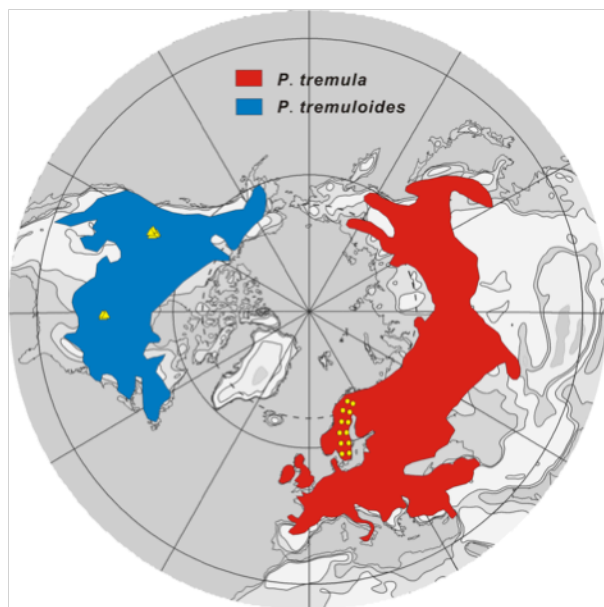

(b)

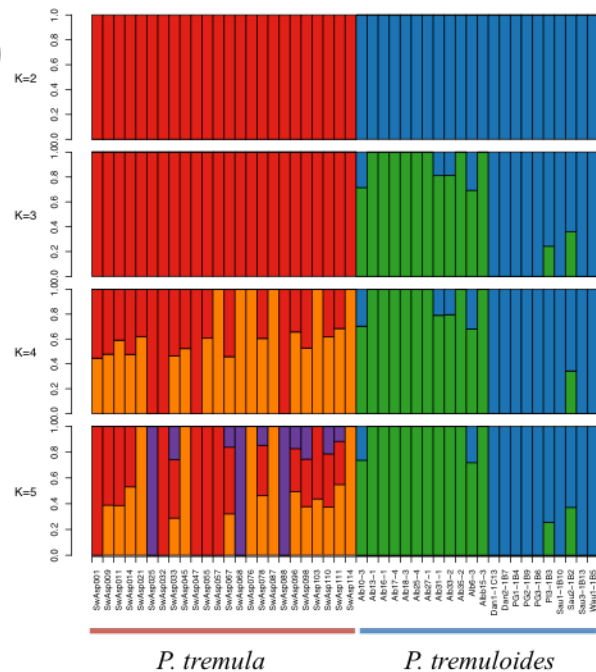

(c)

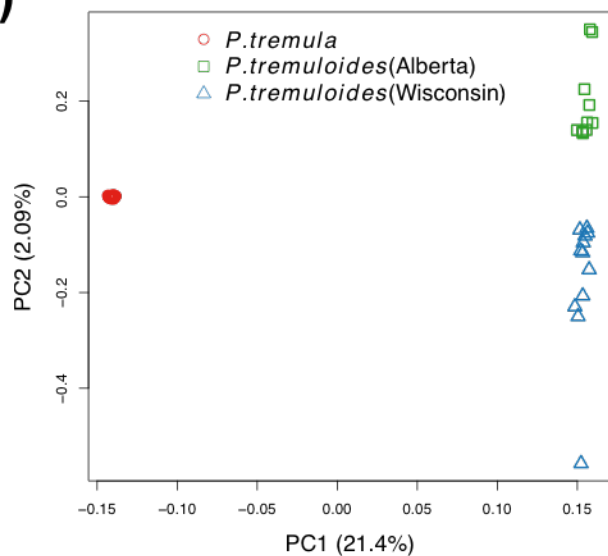

(d)

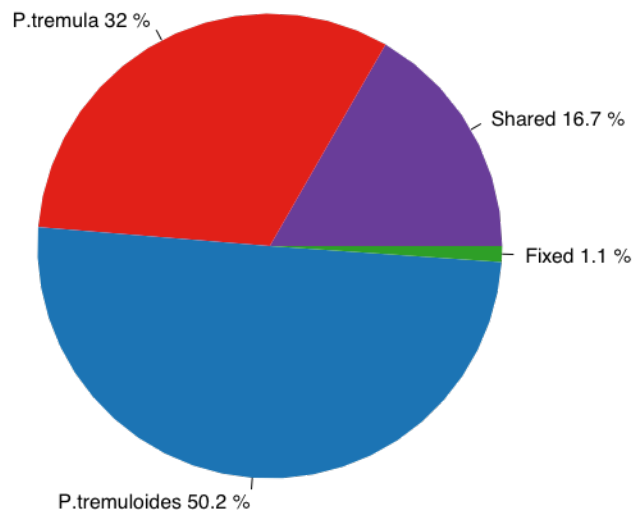

(a)

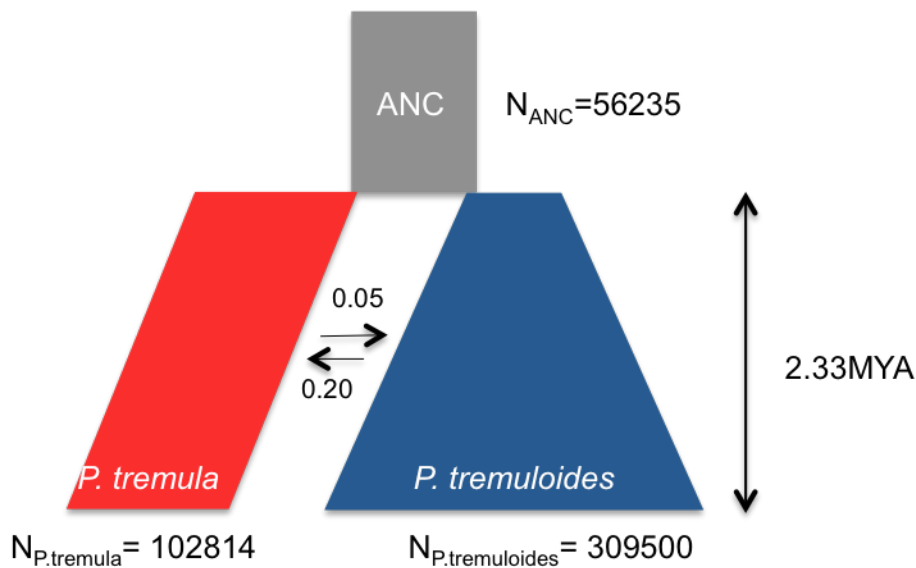

(b)

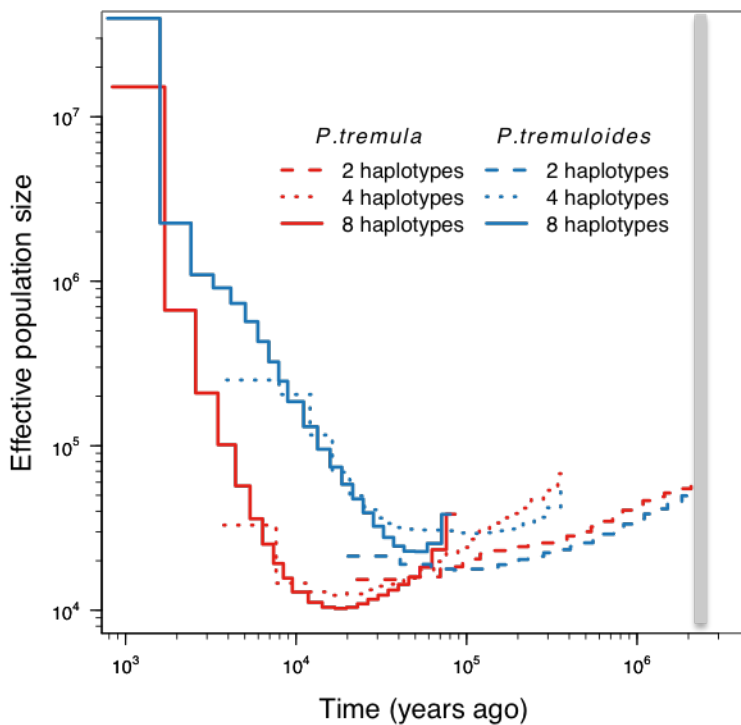

(a)

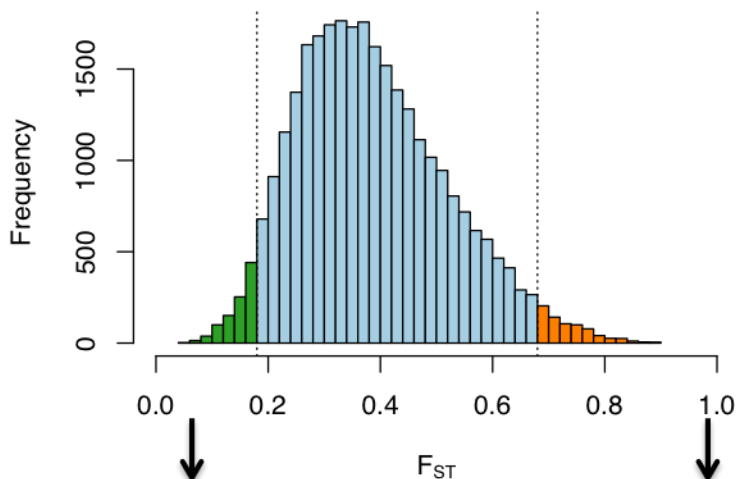

(c)

Step1. Filter windows where coverage breadth < 3000bp

Step2.

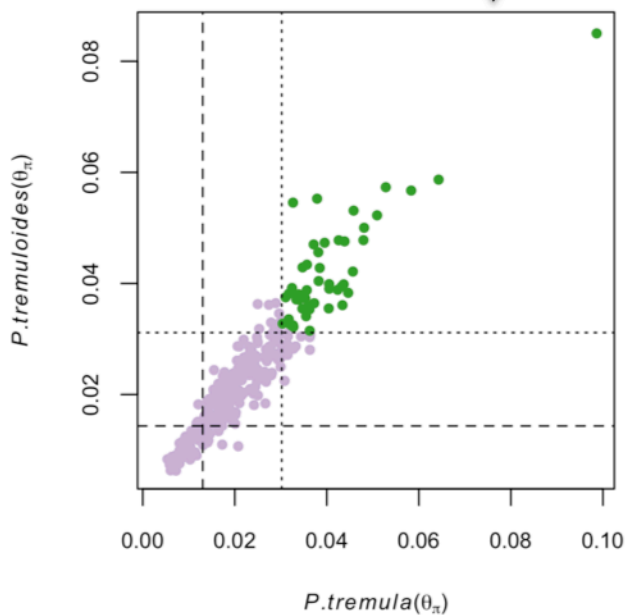

(b)

Step1. Filter windows where  $d_{xy}$  is lower than the median value

Step2.

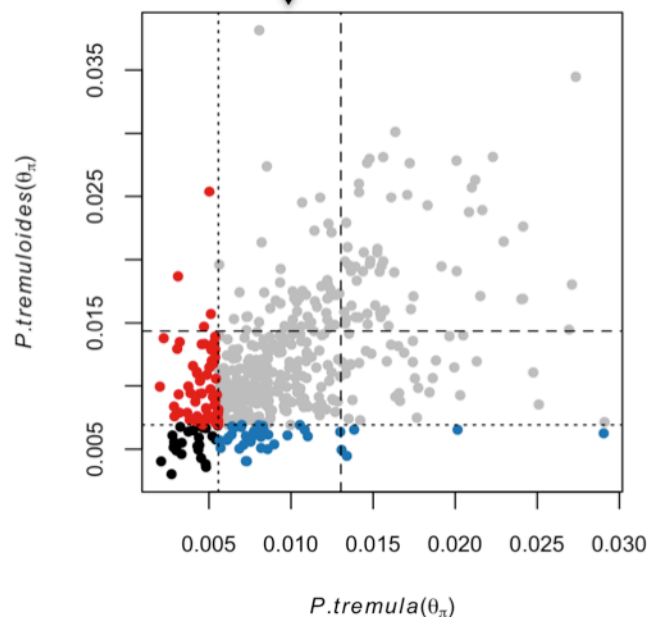

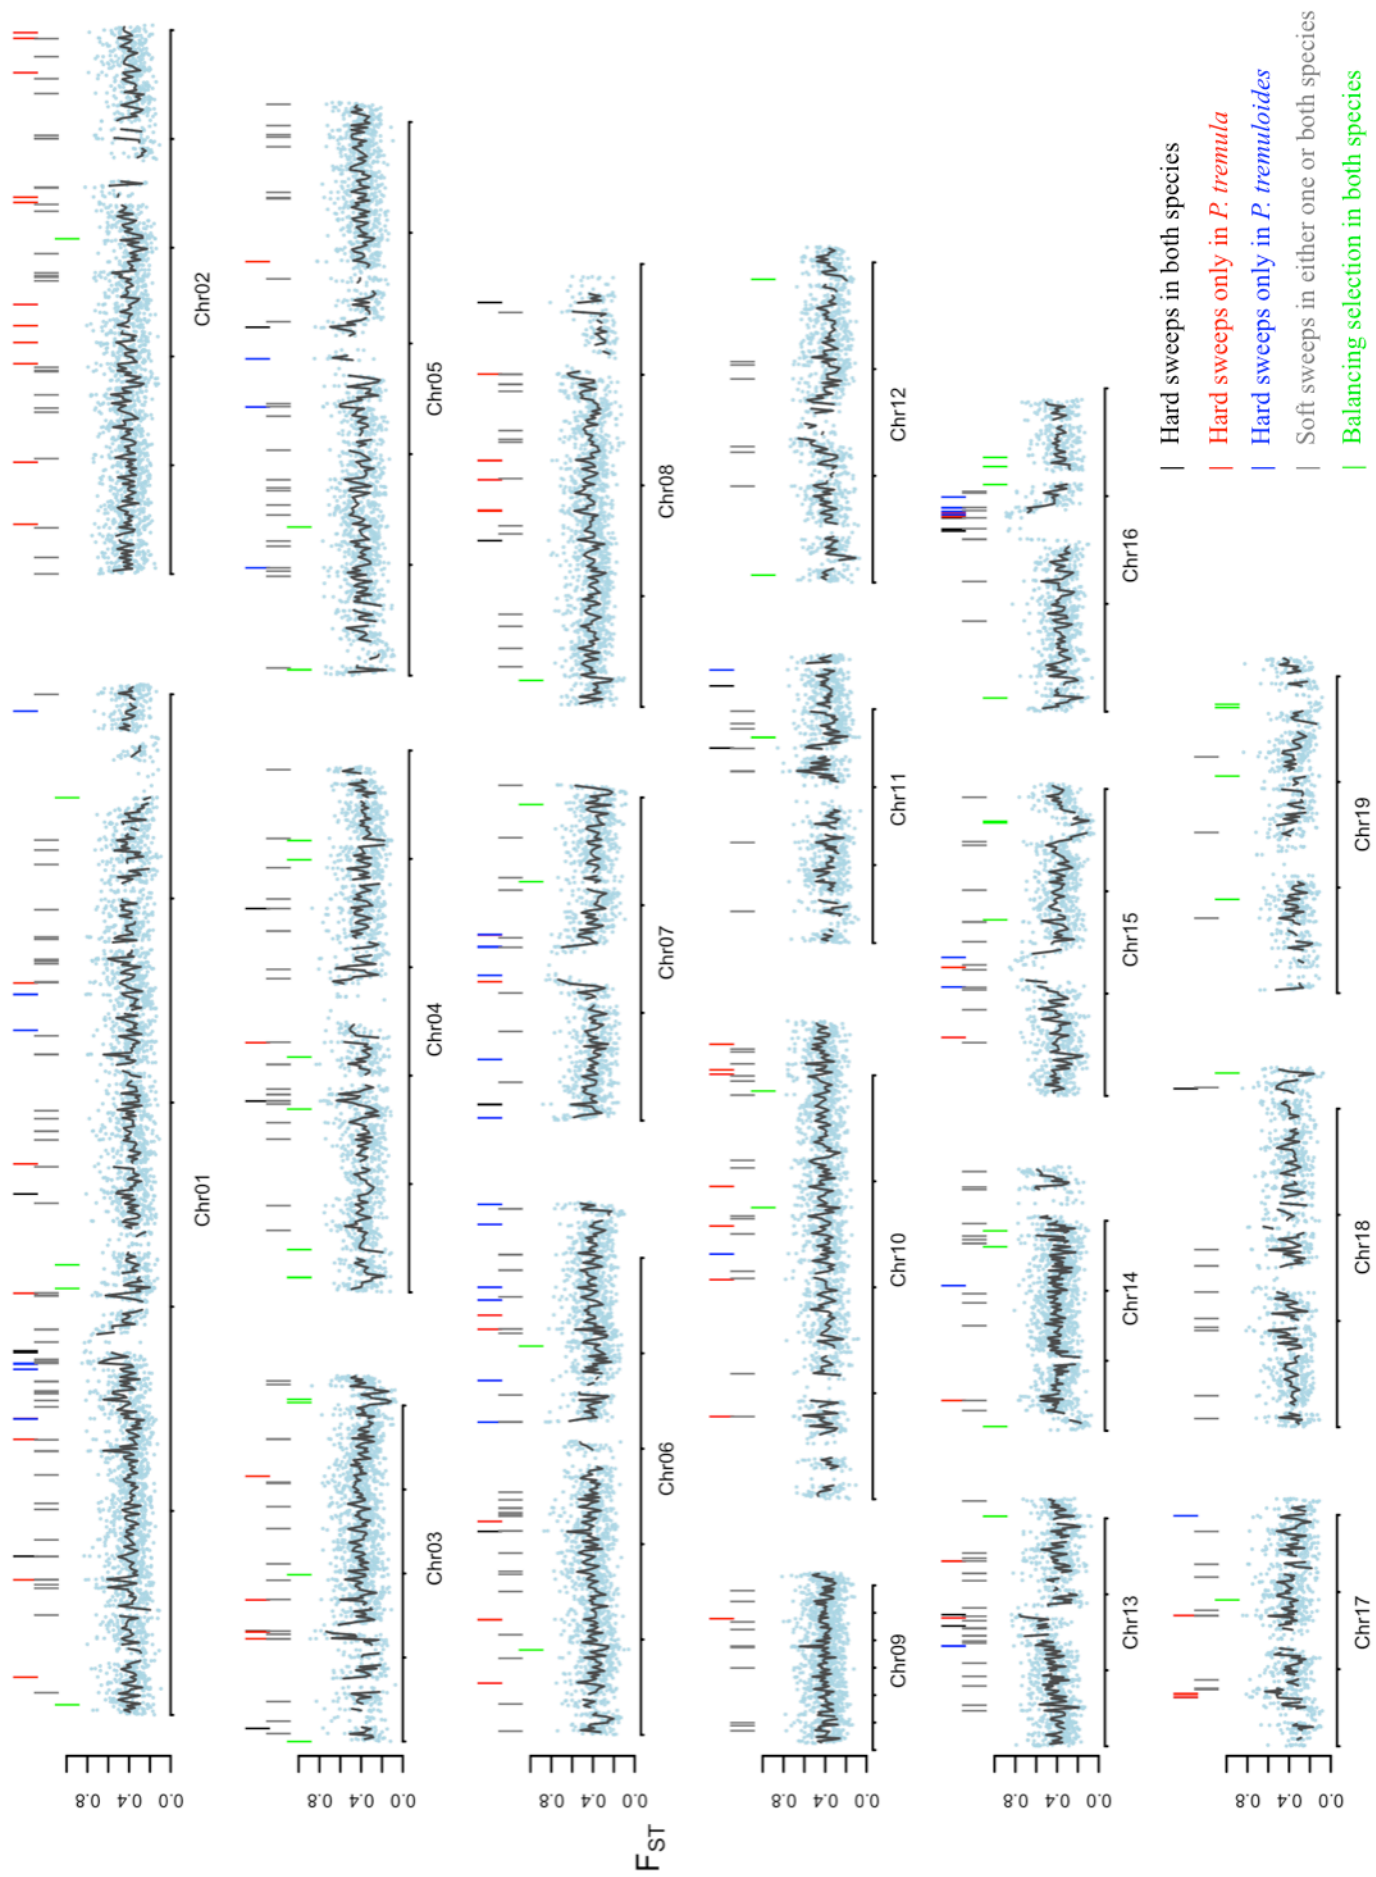

(b)

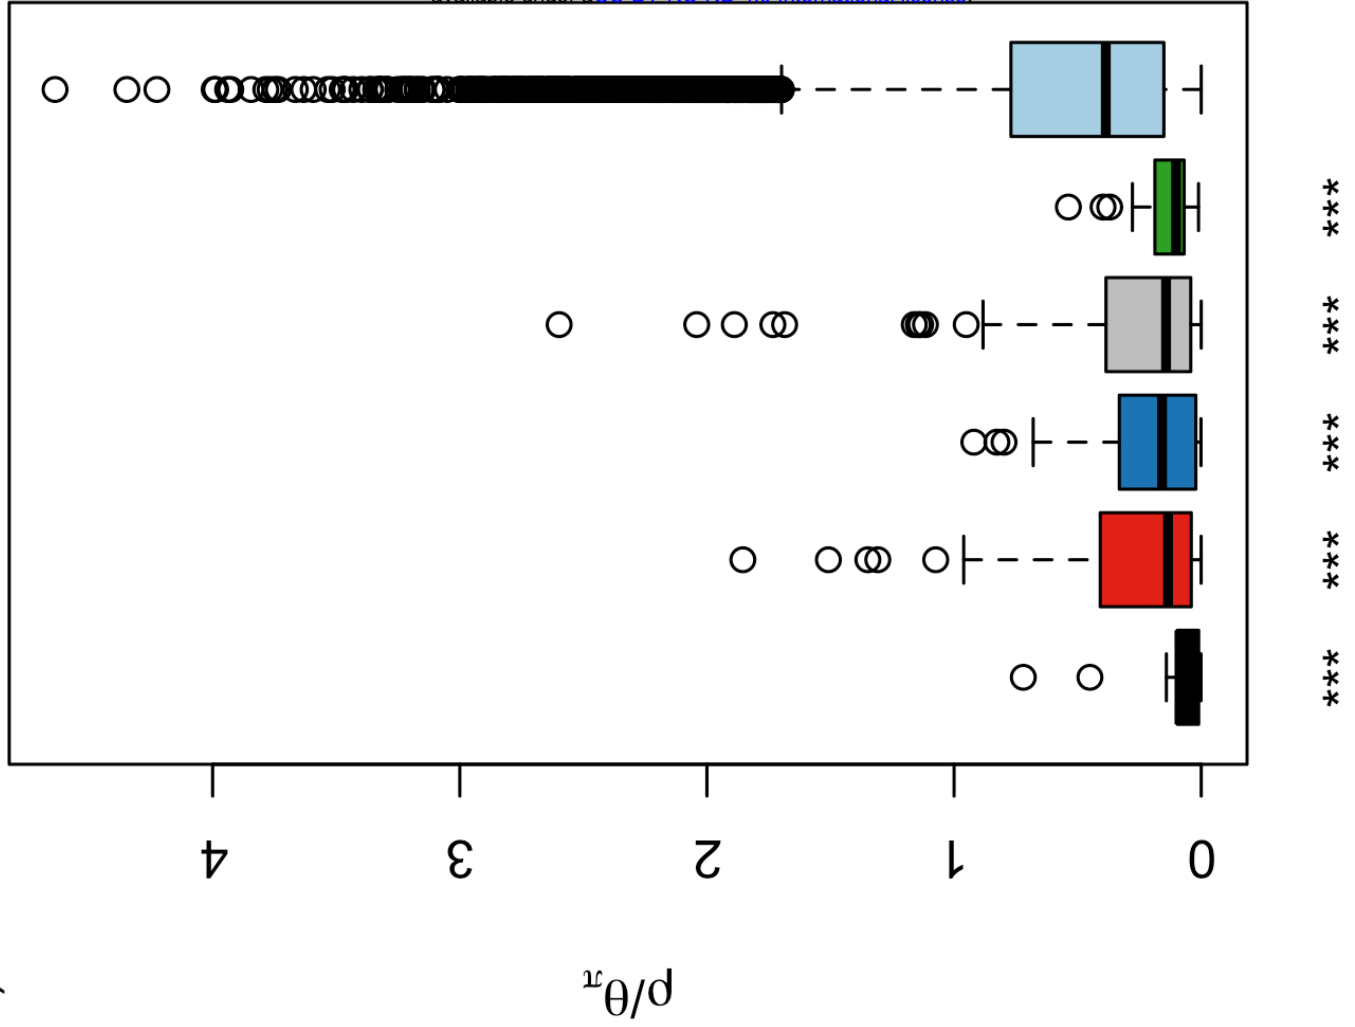

*P. tremuloides*

(a)

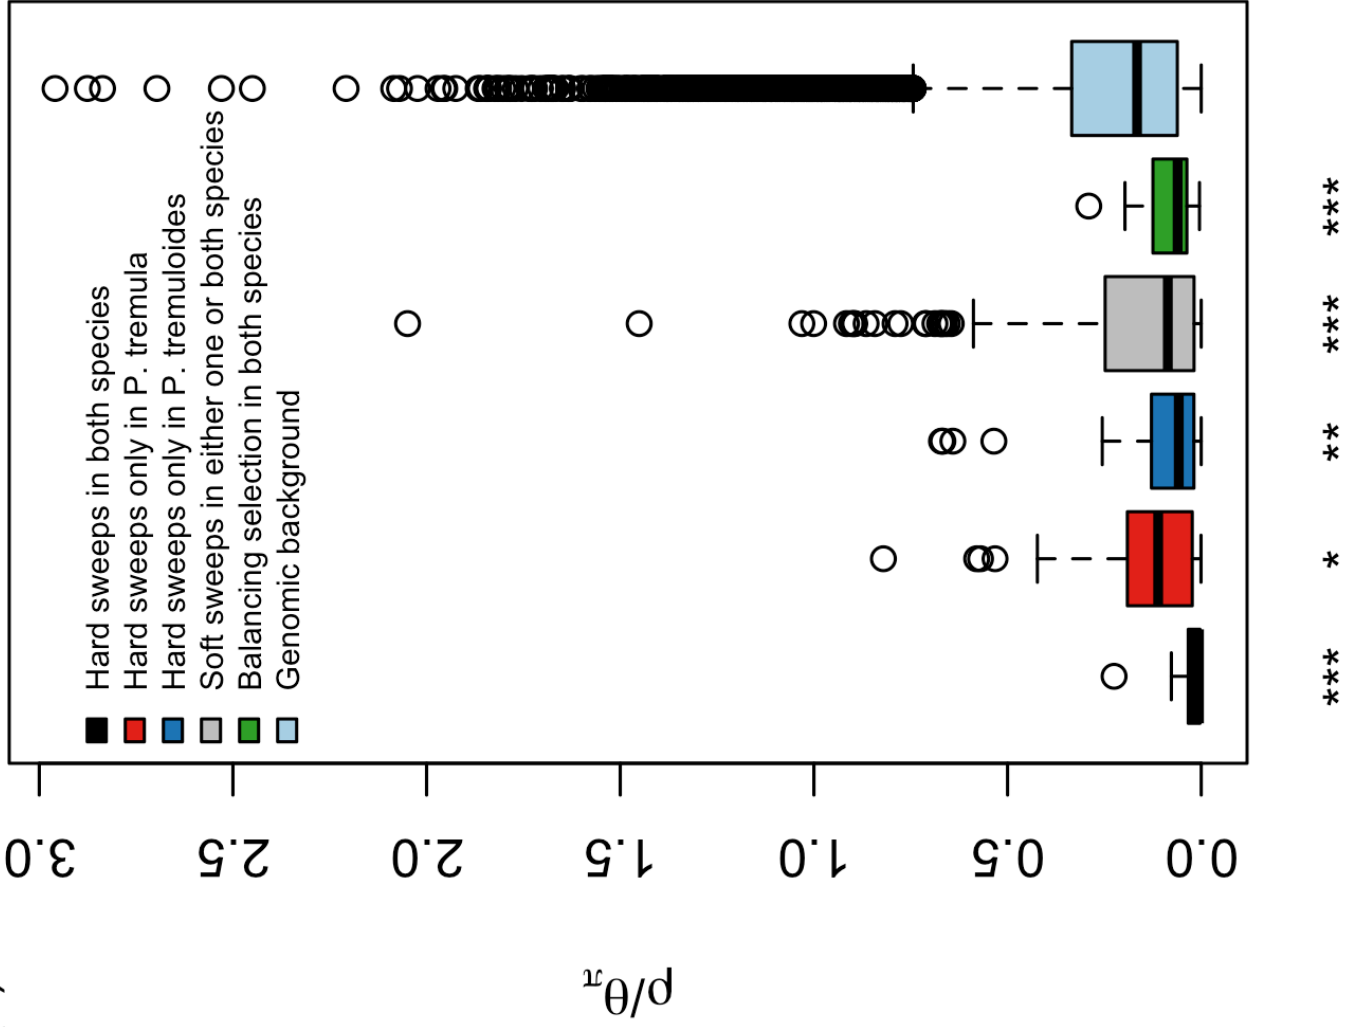

*P. tremula*
